# Supplementary material
Source: PubMed Central journal article supplement (PMC7269162)
Supplement: NIHMS1592015-supplement-Supplemental_Material.pdf [file NIHMS1592015-supplement-Supplemental_Material.pdf]

Figure Supplement 1: Late Toxicity and Failure or Death by Fraction Size

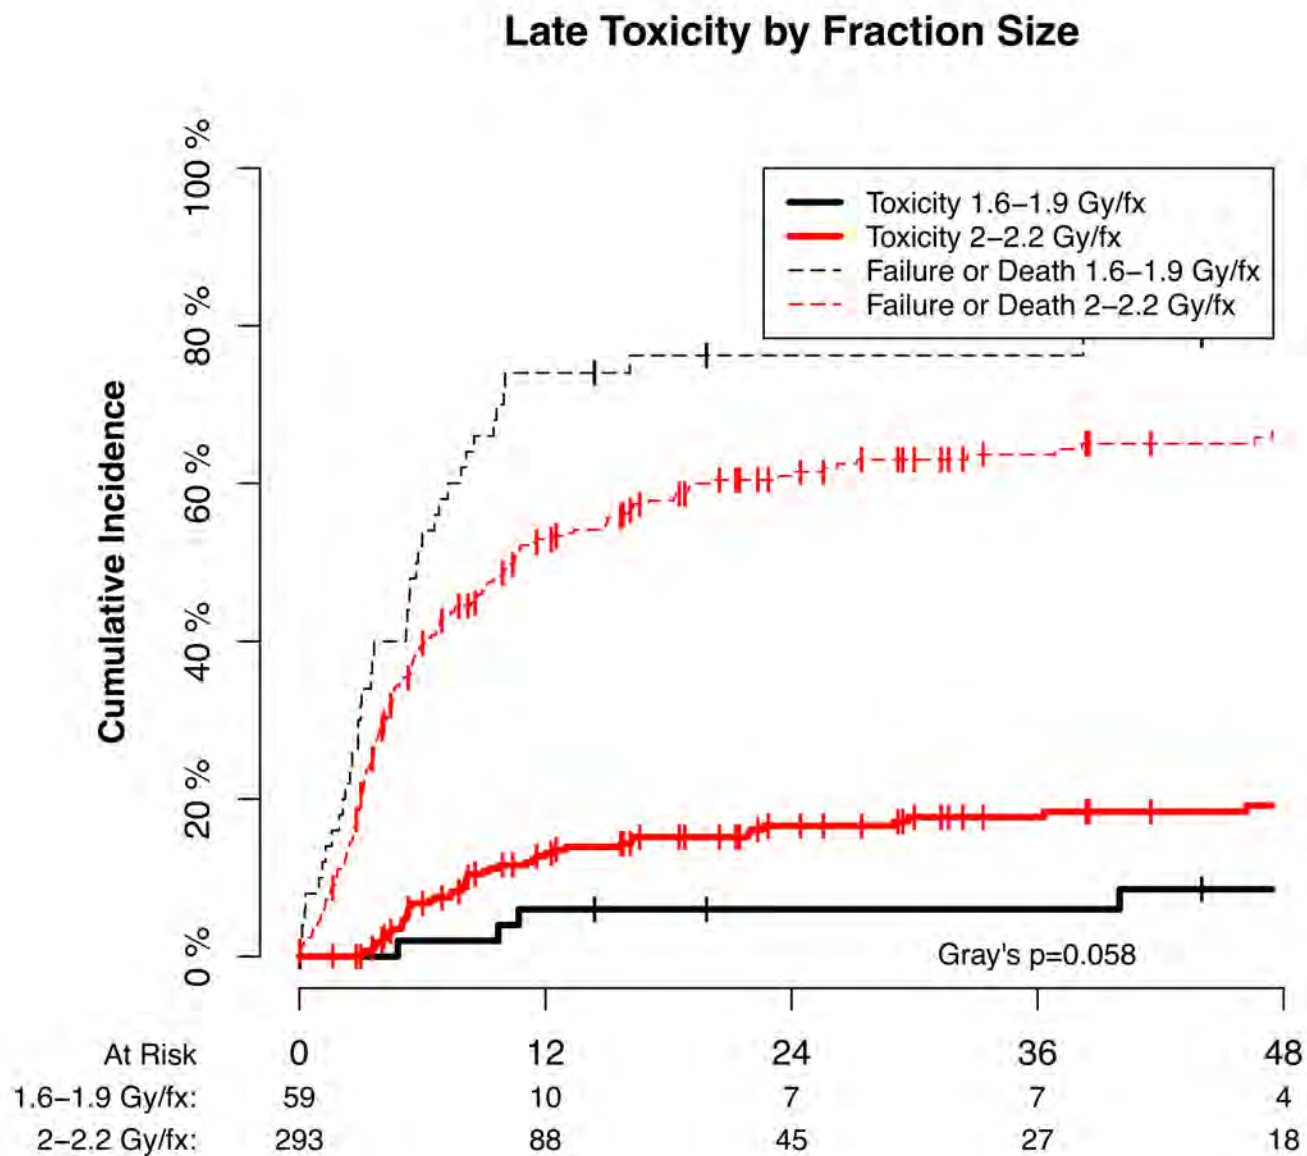

Figure Supplement 2: HPV Status in Recurrent or Second Primary Oropharynx Cancer

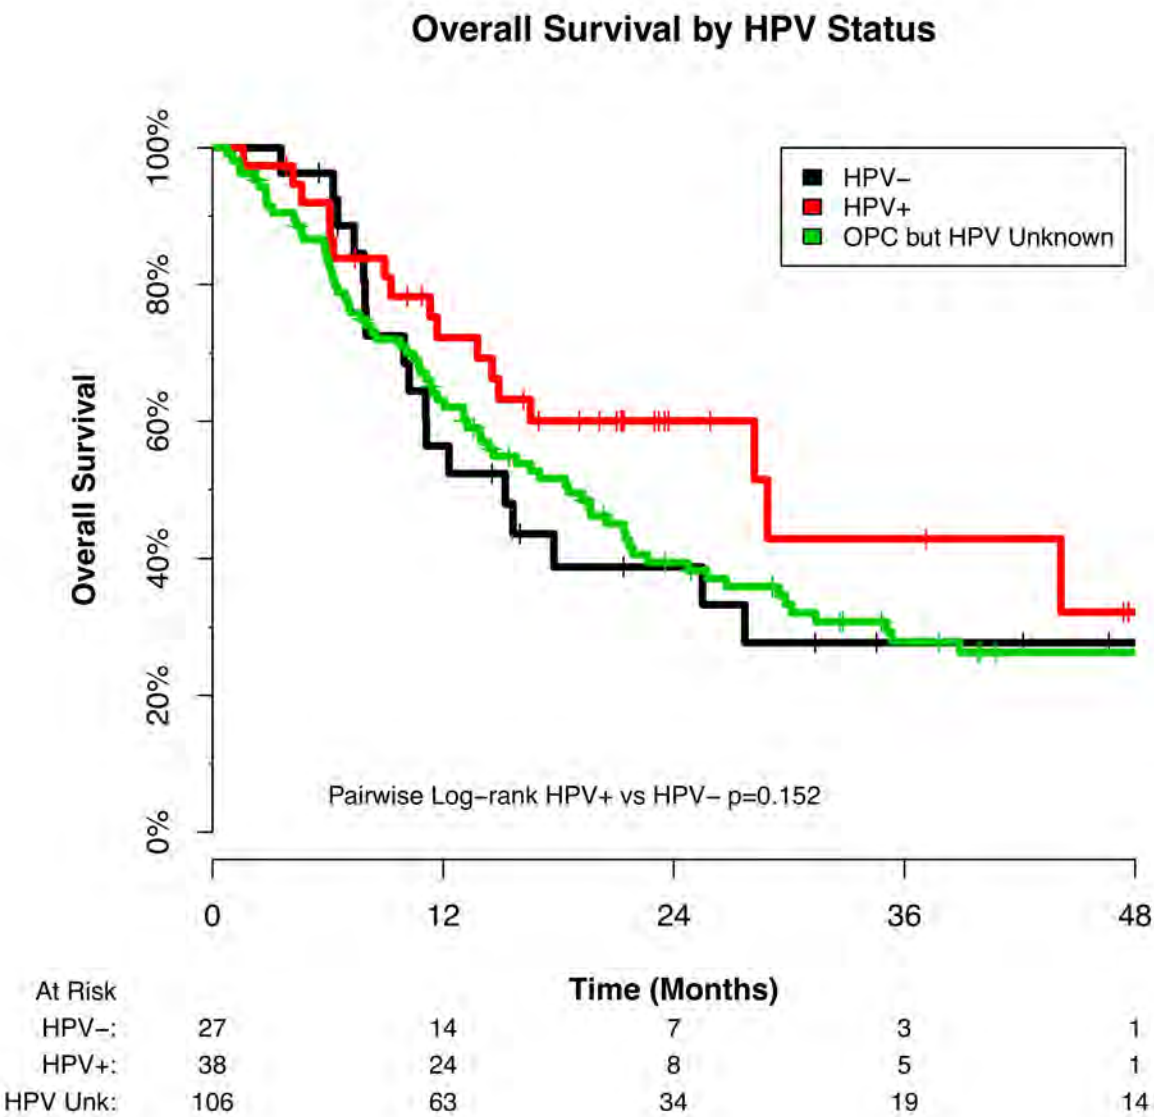

Figure Supplement 3: External Validation of the RPA

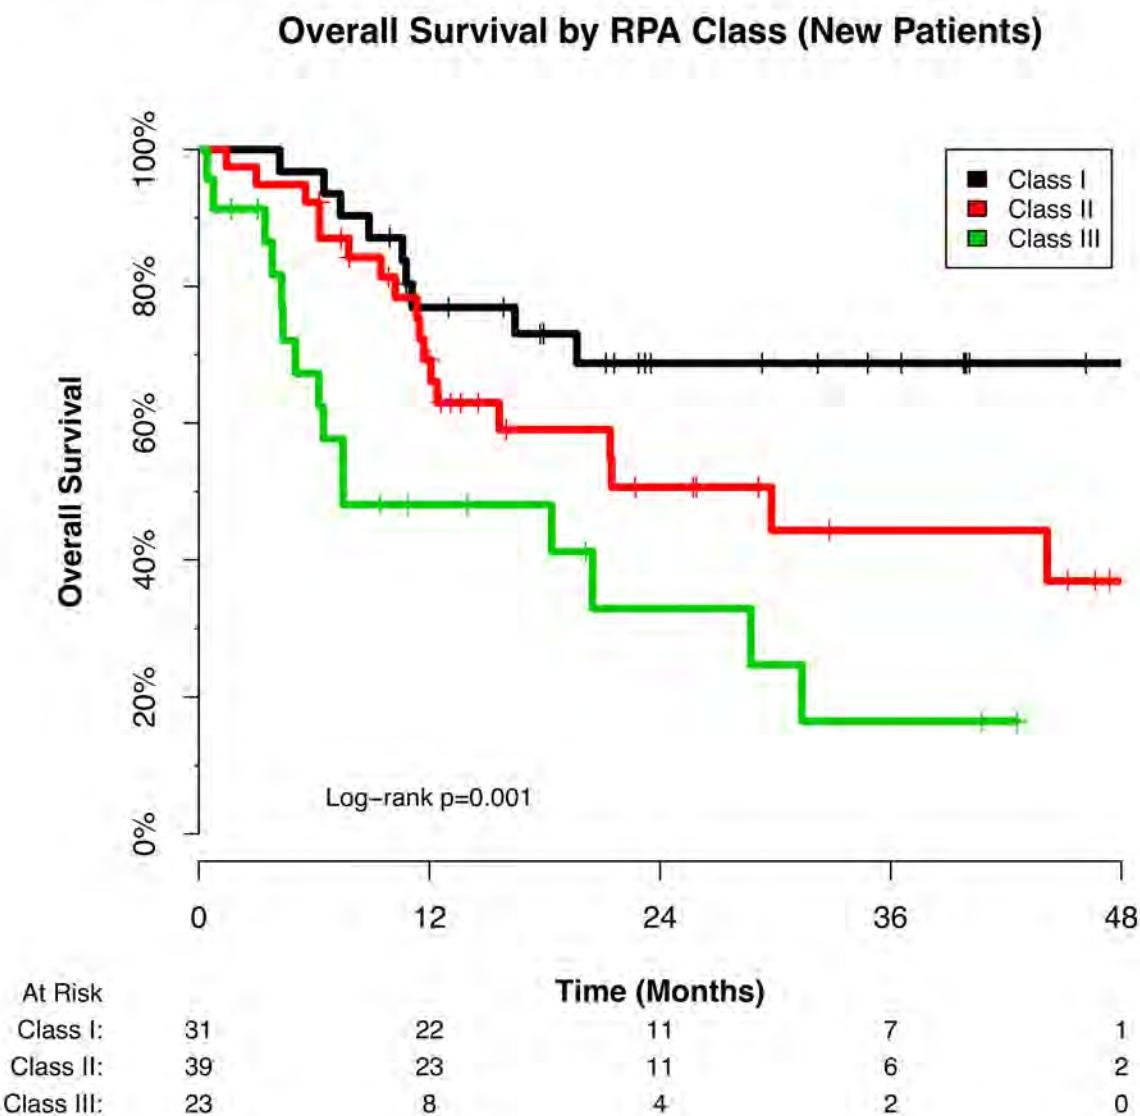

| <b>Supplementary Table 1: Logistic Regression for Acute Grade ≥3 Toxicity</b> |                                                 | <b>Univariable</b>   |               |                  |
|-------------------------------------------------------------------------------|-------------------------------------------------|----------------------|---------------|------------------|
|                                                                               |                                                 | <b>OR</b>            | <b>95% CI</b> | <b>p</b>         |
| Age                                                                           | Cont.                                           | 1.006                | 0.986-1.027   | 0.544            |
| Gender                                                                        | M vs. F                                         | 1.370                | 0.835-2.2137  | 0.204            |
| Charlson                                                                      | 1 vs. 0                                         | 1.296                | 0.738-2.231   | 0.356            |
|                                                                               | ≥2 vs. 0                                        | 1.245                | 0.710-2.139   | 0.434            |
| Tumor Site                                                                    | OPC/Larynx/Hypopharynx vs All Others            | 1.137                | 0.732-1.767   | 0.568            |
| Recurrence or 2nd Primary                                                     | Recurrent vs. 2nd Primary                       | 1.231                | 0.741-2.107   | 0.433            |
| KPS                                                                           | ≤70 vs. >70                                     | 1.234                | 0.635-2.286   | 0.518            |
| rT Classification                                                             | rT4 vs. Others                                  | 2.021                | 1.286-3.170   | <b>0.002</b>     |
| rN Classification                                                             | N+ vs. N0                                       | 1.239                | 0.780-1.975   | 0.365            |
| Organ Dysfunction                                                             | Yes vs. No                                      | 0.966                | 0.620-1.500   | 0.877            |
| Elective Neck Irradiation                                                     | Yes vs. No                                      | 1.102                | 0.703-1.722   | 0.671            |
| Time Between RT                                                               | Cont.                                           | 1.010                | 0.972-1.047   | 0.610            |
|                                                                               | ≤2 years vs. >2 years                           | 1.010                | 0.648-1.569   | 0.965            |
| Systemic Therapy                                                              | Yes vs. No                                      | 1.745                | 0.995-3.229   | 0.061            |
| Re-IMRT Dose                                                                  | ≥66 Gy vs. <66 Gy                               | 0.813                | 0.498-1.301   | 0.396            |
| Fractionation                                                                 | BID vs. QD                                      | 1.002                | 0.571-1.702   | 0.994            |
| Re-IMRT Timing (Surgery)                                                      | Postoperative vs. Definitive                    | 0.984                | 0.633-1.529   | 0.942            |
|                                                                               |                                                 |                      |               |                  |
|                                                                               |                                                 | <b>Multivariable</b> |               |                  |
| Treatment intent and Elective Neck Irradiation<br>(Interaction)               | Definitive without Elective Neck Irradiation    | Ref                  | Ref           | Ref              |
|                                                                               | Definitive with Elective Neck Irradiation       | 0.640                | 0.292-1.332   | 0.238            |
|                                                                               | Postoperative without Elective Neck Irradiation | 0.498                | 0.241-0.986   | <b>0.046</b>     |
|                                                                               | Postoperative with Elective Neck Irradiation    | 3.454                | 1.266-9.889   | <b>0.015</b>     |
| rT Classification                                                             | rT4 vs. Others                                  | 2.320                | 1.451- 3.717  | <b>&lt;0.001</b> |
| Systemic Therapy                                                              | Yes vs. No                                      | 1.442                | 0.795-2.745   | 0.234            |
| Re-IMRT Dose                                                                  | ≥66 Gy vs. <66 Gy                               | 0.840                | 0.499-1.390   | 0.501            |

**Supplemental Table 2: Acute and Late Toxicity Events**

| Acute Events*                 |     |       |  | First Late Event                                         |                |
|-------------------------------|-----|-------|--|----------------------------------------------------------|----------------|
|                               | N   | % Yes |  |                                                          | N              |
| Feeding Tube**                | 38  | 8%    |  | Esophageal Stricture Dilation                            | 21             |
| Wound/Soft Tissue Necrosis    | 21  | 5%    |  | FT Dependence >1 year                                    | 17             |
| Grade 2 Aspiration            | 20  | 4%    |  | Osteoradionecrosis                                       | 14             |
| Other Grade ≥3                | 18  | 4%    |  | Aspiration Pneumonia                                     | 12             |
| Grade 3 Aspiration            | 16  | 3%    |  | New Feeding Tube Placement                               | 4              |
| Bleeding                      | 7   | 2%    |  | Other Late Toxicity                                      | 3              |
| Neutropenic Fever             | 6   | 1%    |  | Fistula/Soft Tissue Complication                         | 3              |
| Stricture                     | 5   | 1%    |  | Carotid Blowout                                          | 1              |
| Mucositis                     | 4   | 1%    |  |                                                          |                |
| Tracheostomy Use***           | 3   | 1%    |  | <b>TOTAL WITH LATE TOXICITY</b>                          | 85             |
| <b>Overall Grade ≥3 Acute</b> | 102 | 19.1% |  | <b>Cumulative Incidence Late Toxicity at 2-Years****</b> | 16.7%          |
|                               |     |       |  | <b>Multiple Late Events</b>                              | 12 of 56 (21%) |

\*Acute rates calculated as a crude proportion of patients with complete toxicity data available on all endpoints (N=462, 91%)

\*\*Omitting pre-existing feeding tube dependence

\*\*\*In patients who did not undergo laryngectomy & tracheostomy was not pre-existing re-irradiation

\*\*\*\*Cumulative incidence of late toxicity calculated using Gray's method accounting for competing risks of recurrence or death (see text for details)
